RESEARCH ARTICLE

# Microwave & magnetic proteomics of macrophages from patients with HIV-associated cognitive impairment

Yisel M. Cantres-Rosario<sup>1</sup>✉, Frances M. Acevedo-Mariani<sup>2</sup>✉, Juliana Pérez-Laspiur<sup>3</sup>, William E. Haskins<sup>4</sup>, Marines Plaud<sup>3</sup>, Yadira M. Cantres-Rosario<sup>3</sup>, Richard Skolasky<sup>5</sup>, Israel Méndez-Bermúdez<sup>6</sup>, Valerie Wojna<sup>7</sup>, Loyda M. Meléndez<sup>1,3\*</sup>

**1** Department of Microbiology and Medical Zoology, University of Puerto Rico, Medical Sciences Campus, San Juan, Puerto Rico, **2** Department of Chemistry, University of Puerto Rico, Rio Piedras Campus, San Juan, Puerto Rico, **3** RCMI Translational Proteomics Center, University of Puerto Rico Medical Sciences Campus, San Juan, Puerto Rico, **4** University of Texas, San Antonio, Texas, United States of America, **5** Johns Hopkins University, Department of Orthopedic Surgery, Baltimore, Maryland, United States of America, **6** Department of Biostatistics and Epidemiology, University of Puerto Rico Medical Sciences Campus, San Juan, Puerto Rico, **7** Department of Medicine, Neurology Division, University of Puerto Rico Medical Sciences Campus, San Juan, Puerto Rico

✉ These authors contributed equally to this work.

\* [loyda.melendez@upr.edu](mailto:loyda.melendez@upr.edu)

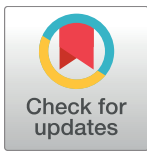

**OPEN ACCESS**

**Citation:** Cantres-Rosario YM, Acevedo-Mariani FM, Pérez-Laspiur J, Haskins WE, Plaud M, Cantres-Rosario YM, et al. (2017) Microwave & magnetic proteomics of macrophages from patients with HIV-associated cognitive impairment. *PLoS ONE* 12(7): e0181779. <https://doi.org/10.1371/journal.pone.0181779>

**Editor:** Alan Winston, Imperial College London, UNITED KINGDOM

**Received:** September 21, 2016

**Accepted:** July 6, 2017

**Published:** July 26, 2017

**Copyright:** This is an open access article, free of all copyright, and may be freely reproduced, distributed, transmitted, modified, built upon, or otherwise used by anyone for any lawful purpose. The work is made available under the [Creative Commons CC0](https://creativecommons.org/licenses/by/4.0/) public domain dedication.

**Data Availability Statement:** All relevant data are within the paper and its Supporting Information files.

**Funding:** This work was supported in part by R01-MH08316, MARC 5T34GM007821-34/35, SNRP-NINDS-1-U54NS43011, INBRE P20RR016470-12, SC1 GM113691, and NIMHHD 8G12-MD007600 Translational Proteomics Center and G12MD007591 from University of Texas San Antonio Pilot project program, IDeA Networks of

## Abstract

### Objective

HIV-infected monocytes can infiltrate the blood brain barrier as differentiated macrophages to the central nervous system, becoming the primary source of viral and cellular neurotoxins. The final outcome is HIV-associated cognitive impairment (HACI), which remain prevalent today, possibly due to the longer life-span of the patients treated with combined anti-retroviral therapy. Our main goal was to characterize the proteome of monocyte-derived macrophages (MDM) from HACI patients, and its association with their cognitive status, to find novel targets for therapy.

### Methods

MDM were isolated from the peripheral blood of 14 HIV-seropositive women characterized for neurocognitive function, including: four normal cognition (NC), five asymptomatic (A), and five with cognitive impaired (CI). Proteins from macrophage lysates were isobaric-labeled with the microwave and magnetic (M2) sample preparation method followed by liquid chromatography-tandem mass spectrometry-based protein identification and quantification. Differences in protein abundance across groups classified by HACI status were determined using analysis of variance.

### Results

A total of 2,519 proteins were identified with 2 or more peptides and 28 proteins were quantified as differentially expressed. Statistical analysis revealed increased abundance of 17 proteins in patients with HACI ( $p < 0.05$ ), including several enzymes associated to the glucose

Biomedical Research Excellence (INBRE-PR) P20RR016470, RISE R25GM061838, and PRCTR-NCRR-P20RR11126. Laboratory space provided by the UPR-Comprehensive Cancer Center (CCC) through a memorandum of understanding between the UPR-CCC and the UPR Medical Sciences Campus. The content is solely the responsibility of the authors and does not necessarily represent the official views of the University of Puerto Rico Comprehensive Cancer Center. The funders had no role in study design, data collection and analysis, decision to publish, or preparation of the manuscript.

**Competing interests:** The authors have declared that no competing interests exist.

metabolism. Western blot confirmed increased expression of 6-Phosphogluconate dehydrogenase and L-Plastin in A and CI patients over NC and HIV seronegatives.

## Conclusions

This is the first quantitative proteomics study exploring the changes in protein abundance of macrophages isolated from patients with HAcI. Further studies are warranted to determine if these proteins may be target candidates for therapy development against HAcI.

## Introduction

The human immunodeficiency virus type 1 (HIV) pandemic has caused more than 35 million deaths since its discovery [1]. HIV infiltrates to the central nervous system (CNS) carried mostly by activated monocytes crossing the blood brain barrier (BBB) early in the infection. Once in the CNS, HIV-infected monocytes mature into macrophages and secrete cellular and viral toxins that induce neuronal damage, promoting the activation of local brain cells and persistent inflammation [2]. The macrophages also become major viral reservoirs in the CNS [3]. The inflammation and secretion of soluble neurotoxic factors by HIV-infected and non-infected activated cells trigger neuronal dysfunction. Together, these are the processes underlying the development of HAcI. Symptomatology ranges from asymptomatic to full blown dementia. In the era of cART [4,5], approximately 10 to 50% of the individuals infected with HIV still develop a mild form of neurocognitive impairment, highlighting the urgent need to find novel targets for therapy development against HAcI.

Since monocytes and macrophages are the key players in HAcI, understanding the proteins and pathways altered in macrophages upon HIV infection, might help in preventing this disease. One of the neurotoxic proteins secreted by HIV-infected MDM and microglia is cathepsin B [6–8], a lysosomal cysteine protease. HIV infection disrupts cathepsin B interaction with its natural inhibitors in macrophages: cystatins B and C [6,9,10]. Moreover, cathepsin B and cystatin B are increased in monocytes from HIV-infected women with CI compared to HIV-seropositive women with normal cognition [7]. These results suggest that the uncontrolled expression and secretion of these proteins might be possible actors in the development of HAcI.

Several proteomics approaches have been applied in the search for better drugs for HAcI patients. These include surface enhanced laser desorption/ionization (SELDI)-time of flight (TOF) [4,11], stable isotope labeling of cells in culture (SILAC) [12], two-dimensional difference in gel electrophoresis (2-DIGE) [13], and isobaric tag for relative and absolute quantification (iTRAQ) of MDM secretome [14]. Although several *ex vivo* studies have investigated the changes in monocyte proteome from HIV-infected patients using these diverse proteomics approaches, none of these methods have been applied to identify macrophage intracellular proteins from HAcI patients with cART. It is the macrophage, the cell releasing virus particles and toxins to the CNS. In our study, we selected macrophages after isolation and differentiation of blood monocytes from patients with HAcI *in vitro*, to determine the relation between the changes in MDM proteome with their degree of neurocognitive impairment. To answer this question, we applied a rapid quantitative proteomics approach involving isobaric labeling with the microwave and magnetic (M2) proteomics sample preparation method [15–18] followed by liquid chromatography-tandem mass spectrometry (LC/MS/MS)-based protein identification and quantification. This method revealed differentially expressed proteins in

MDM from 14 HIV-seropositive patients: four with normal cognition (NC), and 10 with HAcI: five asymptomatic (A), and five neurocognitive impaired (CI). Seventeen proteins were increased in patients with HAcI. One of these proteins, L-plastin, was confirmed by Western blot and four proteins (fructose-bisphosphate aldolase, glyceraldehyde-3-phosphate dehydrogenase, phosphoglycerate kinase, and pyruvate kinase), related to glucose metabolism approached significance during validation. Our results provide important information for additional protein targets related to HAcI that deserve further studies in a higher number of patients.

## Materials and methods

### Patients

The study patients are from the Hispanic-Latino longitudinal cohort of HIV-seropositive women, followed since 2001 as part of the Specialized Neuroscience Research Program at the University of Puerto Rico, Medical Sciences Campus. The study was focused in women because this cohort was originally funded for two projects, one requiring women for hormone studies. Samples for this cross-sectional study were collected from 2009–2011 with funding from NIMH and approval of the Institutional Review Board (UPR-MS; IRB# 0720109), Human Research Subjects Protection Office. The patients signed an informed consent for this study. Patients with hepatitis C, positive toxicology, or any other neuro-infectious disease were excluded. The neuropsychological performance was determined using Memorial Sloan Kettering (MSK) rating scale as modified by Marder et. al (2003) [19] stratifying patients in the following categories: normal cognition (NC) with MSK of zero, Asymptomatic (A) with MSK of 0.5, and cognitive impaired (CI) with  $MSK \geq 1$ . All patients were evaluated with neuropsychological tests, macroneurological exam, and activities of daily living as previously described in Wojna et al (2006) [20].

### Cell cultures

Blood samples were collected from all patients in the mornings, prior to Neurological and Neuropsychological testing. Peripheral blood mononuclear cells (PBMCs) were isolated from the peripheral blood (40 mL) of patients using Lymphosep<sup>®</sup> medium and gradient centrifugation (MP Biomedicals, Solon, Ohio) of PBMCs. All the PBMCs isolation and cultures were conducted by the same technician. Cells were cultured in RPMI supplemented with 20% heat-inactivated FBS (Sigma-Aldrich, St. Louis, MO), 10% heat-inactivated human serum (Sigma-Aldrich), and 1% Pen/Strep (Sigma-Aldrich) in T-25 flasks at a concentration of  $1.5 \times 10^6$  cells/mL. MDM were selected by adherence after 7 days in culture. Half of the medium was changed every 3 days for all cultures. On day 6, media was replaced with serum-free media, and cells were collected 24 hours later following removal of serum-free media and preparation of cell lysates.

### Specimens from study patients

Patient specimens were stratified into 4 isobaric-labeled pools in a manner similar to that previously described in other M2 proteomics studies [15–18]: four patients with normal cognition ( $MSK = 0$ ) with tandem mass tag (TMT) labels 126–129 as pool 1; five asymptomatic patients ( $MSK = 0.5$ ) with labels 126–130 as pool 2, and five CI patients ( $MSK = 1$ ) with labels 126–130 as pool 3. Label 131 combined the Pool 1, 2, and 3 as reference pooled material made by adding the same protein amount from all specimens (NC, A, and CI).

## Preparation of cell lysates

Lysis buffer (100 $\mu$ L of 5mM Tris-HCl buffer at H 8.0, 0.1M Triton X-100 and protease inhibitor cocktail) was added to macrophages for 30 minutes on ice and detached with a cell scraper. Cell lysates were vortexed and centrifuged at 4°C for 10 minutes at 1,500 rpm. Supernatants were collected and stored in aliquots at -80°C. Protein concentration was determined using the BCA assay (Bio-Rad, Hercules, California).

## M2 proteomics sample preparation

Cell lysates (100 $\mu$ g) were dried in Speed Vacuum and then reconstituted with 100 $\mu$ L of Equilibration Buffer (200mM NaCl) (Acros Organics, Geel, Belgium), 0.1% Trifluoroacetic acid (TFA; Sigma-Aldrich) in HPLC water (JT Baker, Center Valley, PA). The C8 magnetic BCMag beads (BioClone, San Diego, CA) were mixed with 50% Methanol (Fisher Optima, Waltham, MA) at a concentration of 50mg/ml. After reconstitution, 10 $\mu$ L of magnetic beads were transferred (50mg/ml) to a micro-centrifuge tube and placed on magnet for three minutes. After removal of supernatants, 100 $\mu$ L of equilibration buffer was added and washed by centrifugation. The supernatant was removed and the procedure was repeated three times for three minutes each. A total of 100 $\mu$ L of sample was mixed with 1/3<sup>rd</sup> volume of binding buffer (800mM NaCl in 0.4% TFA) and added to the beads in the micro-centrifuge tube. The sample and beads were mixed again and after 5 minutes at RT, the tubes were placed on the magnet and the supernatant was removed. A volume of 150 $\mu$ L Triethyl Ammonium Bicarbonate (TEAB) buffer (Sigma-Aldrich) was added and placed again on magnet for three minutes and the supernatant was discarded. This was repeated three times. A volume of 150 $\mu$ L of 10mM of Dithiothreitol (DTT) (Agilent, Santa Clara, CA) was added and the tube was incubated for 10 seconds in the microwave. The DTT was removed by placing on the tube in the magnet for three minutes. A volume of 150 $\mu$ L of 50mM of Iodoacetamide (IAA) (GE Healthcare, Little Chalfont, UK) was added and the tube was microwaved for 10 seconds. The IAA was discarded after placing the tube on magnet for three minutes. The TEAB buffer (150 $\mu$ L) was added and the tube placed on the magnet for three minutes and the supernatant was discarded. This was repeated three times. A total of 100 $\mu$ L of enzyme solution, at ratio 1:25 trypsin: protein (Thermo Scientific; in 40mM TEAB buffer) was added to the beads and microwaved for 60 seconds. The tube was placed again on the magnet for three minutes and the supernatant was carefully eluted into new tubes, on ice. The samples were stored in -80°C until TMT labeling.

## Isobaric labeling

Immediately before use, the 6-plex TMT reagents (Thermo Scientific 126-131Da) were equilibrated to room temperature. For the 0.8 mg vials, 41 $\mu$ L of anhydrous acetonitrile (Thermo Scientific) was added to each tube and dissolved for 5 minutes with occasional vortex and incubated in the microwave for sixty seconds (triplicate of twenty seconds each). Thereafter, 8 $\mu$ L of 5% hydroxylamine (Sigma-Aldrich) in 1 M TEAB solution was added to the sample and incubated for 15 minutes to quench the reaction. Samples were combined at equal amounts and stored at -80°C.

## LC/MS/MS with protein database searching

LC/MS/MS was performed as previously described [2] by the RCMi Protein Biomarker Core, University of Texas, San Antonio, Texas. Briefly, LC/MS/MS was performed with a split-less nanoLC-2D pump (Eksigent, Livermore, CA, USA), a 50- $\mu$ m id column packed with 7 cm of 3  $\mu$ m-od C18 particles, and a hybrid linear ion trap-fourier-transform tandem mass

spectrometer (LTQ-ELITE; Thermo Fisher, San Jose, CA, USA) operated with a lock mass for calibration. For unbiased analyses, the top six most abundant eluting ions were fragmented by data-dependent high-energy collision-induced dissociation. The reverse-phase gradient was 2 to 62% of 0.1% formic acid in acetonitrile over 60 min at 350 nL/min. All MS/MS spectra from tryptic peptides were analyzed using the probability-based protein database-searching algorithm Mascot (Matrix Science, London, UK; version 2.4.1). The SwissProt\_041614 protein database (Homo sapiens; 20,340 sequences) was employed with a product ion mass tolerance of 0.050 Da and a precursor ion tolerance of 10.0 ppm. A static carbamidomethyl modification was selected for cysteine residues, while oxidation of methionine residues, N-terminal pyroglutamate and N-terminal acetylation were selected as variable modifications. Scaffold (version Scaffold\_4.6.1, Proteome Software Inc., Portland, OR) was used to confirm MS/MS-based assignments. Peptides were accepted if they could be established at greater than 80.0% probability by the Peptide Prophet algorithm [21] with Scaffold delta-mass correction. Peptide false discovery rate was 1.0%. Protein assignments were accepted if they could be established at greater than 90.0% probability and contained at least 2 identified unique peptides. Protein probabilities were assigned by the Protein Prophet algorithm [22]. Proteins that contained similar peptides and could not be differentiated based on MS/MS analysis alone were grouped to satisfy the principles of parsimony. Proteins sharing significant peptide evidence were grouped into clusters. The protein false discovery rate was 6.7%.

### Ingenuity pathway analysis

From the 28 proteins identified, the significant differentially expressed proteins ( $n = 17$ ) were imported to IPA software using their Swiss-protein accession ID and the fold change of the TMT labeling relative intensities to perform a core analysis on each of the following comparisons: A vs. NC, CI vs. NC and CI vs. A. IPA software linked the proteins to the relevant canonical signaling pathways, diseases and disorders, molecular functions and a predicted network of interactions.

### Western blotting

Fourteen of the 17 differentially expressed proteins were investigated by western blot. Western blot verification was conducted with the same samples used for TMT labeling. Briefly, 20 $\mu$ g of protein from each cell lysate was separated by SDS-PAGE, fixed, and electro-transferred to PVDF Membranes (BioRad). Membranes were incubated overnight at 4°C with primary antibodies including: mouse anti-actinin alpha 1 (1:1,000; R&D systems, Minneapolis, MN), mouse anti-aldolase (1:1,000; Abcam, Cambridge, United Kingdom), mouse anti- $\beta$ -Actin (1:5,000; Sigma-Aldrich), mouse anti-cathepsin B (1:250; Sigma-Aldrich), mouse anti-filamin A (1:1,000; Abcam), mouse anti-galectin-3 (1:250; Abcam), mouse anti-heat shock protein (HSP70) (1:2,500; R&D), mouse anti-moesin (1:1,000; Abcam), rabbit anti-6-phosphogluconate dehydrogenase (PGD) (1:5,000; Abcam), mouse anti-phosphoglycerate kinase-1 (PGK1) (1:1,000; Abcam), rabbit anti-L-Plastin (1:10,000; Abcam), mouse anti-tubulin-alpha (1:1,000; Thermo-Scientific), mouse anti-GAPDH (1:1,000; Santa Cruz Biotechnologies, Dallas, TX) or mouse anti-Vimentin (1:1,000; Abcam). Membranes were washed and incubated with horseradish peroxidase (HRP)-conjugated rabbit anti-mouse (1:10,000) or goat anti-rabbit (1:10,000) secondary antibodies (Sigma-Aldrich). HRP activity was visualized by an enhanced chemiluminescence detection procedure (Thermo Scientific). The band volume intensity from each protein was measured using ImageLab software (Bio-Rad), and normalized against the band volume of GAPDH for each PVDF membrane.

## Statistics

Mean and standard deviation of relative intensities of the identified proteins by cognitive group (NC; A; and CI) were calculated. Analysis of variance was used to determine the presence of between group differences in relative abundance. For proteins with significant between group differences in relative abundance, post-hoc pairwise comparison using Student's t-test was used. Thresholds for statistical significance were \* $p < 0.05$  and \*\* $p < 0.01$ , while the threshold for practical significance was a fold-change (F.C.) of 1.5. SAS software version 9.3 (SAS Institute, Cary NC) was used for all analyses. The western blots were analyzed using One Way Analysis of Variance (ANOVA), with Tukey's post-hoc tests. Same thresholds described before for statistical significance were maintained. Tests were performed using GraphPad Prism 6.0 software (San Diego, CA).

## Results

### Isobaric labeling of proteins in specimens from study patients

The HAcI classification of the 14 Hispanic Latino women that provided specimens for M2 proteomics analysis is described in [Table 1](#). Ten of the 14 patients were taking cART. We did not find significant differences in CD4 count, plasma viral load or CSF penetration index (CPE) between HIV seropositive subjects with normal cognition and those with HAcI ( $p > 0.05$ ) by ANOVA. The viral load of  $1.7 \log_{10} = 50$  copies/mL present in 7/14 or 50% of the total patients indicates that these patients are virally suppressed. Viral suppression by HAcI category was: 25% (1/4) for NC; 60% (3/5) for A; and 60% (3/5) for CI. [Table 1](#) also shows the patient population stratified into 3 label pools that included: four patients with normal cognition (MSK = 0) with TMT labels 126–129 as pool 1; five asymptomatic patients (MSK = 0.5) with TMT labels 126–130 as pool 2, and five CI patients (MSK = 1) with TMT labels 126–130 as pool 3. TMT label 131 combined the Pool 1, 2, and 3 as reference pooled material made by adding the same protein amount from all specimens (NC, A, and CI).

### M2 proteomics

A total of 3,499 proteins were identified with LC/MS/MS and protein database searching, from which 2,519 proteins, with a minimum of 2 unique peptides, were selected for further analysis. The protein names, accession numbers, sequence coverage, and expectation values are described in [S1 Table](#). Qualitative analysis is described in [Table 1](#). Quantitative analysis is described in [S2 Table](#).

M2 proteomics revealed 28 proteins associated with HAcI. There were 9 proteins that were differentially expressed (7 up-regulated and 2 down-regulated) between the HAcI categories using  $p < 0.01$  as the statistical significance threshold, and there were 17 proteins that were differentially expressed (15 up and 2 down) using  $p < 0.05$  as the statistical significance threshold. We continued to use  $p < 0.05$  as statistical significance threshold for our analyses ([Table 2](#)). These 17 proteins included enzymes from the glucose metabolic pathways: heat shock proteins; proteins involved in maintenance of cell structure and motility, cell regulation, protein synthesis and turnover, cellular stress and inflammatory response. The impact of a 1.5 fold-change (F.C.) practical significance threshold for the 7 proteins found with this characteristic is described in [Table 2](#).

### CI vs. NC

Five enzymes related to glucose metabolism were identified as differentially expressed in HAcI. These were glyceraldehyde-3-phosphate dehydrogenase (GAPDH), pyruvate kinase



**Table 1. Patient samples used for TMT labeling.**

| Patient Number | Visit | MSKN | HAcI category | TMT Label* | Pool | Age | Plasma Viral Load (Log <sub>10</sub> copies/mL) | CD4 count (cells/mm <sup>3</sup> ) | CPE <sup>a</sup> | Combined Antiretroviral Therapy (cART)          |
|----------------|-------|------|---------------|------------|------|-----|-------------------------------------------------|------------------------------------|------------------|-------------------------------------------------|
| 59             | 13    | 0    | NC            | 126        | 1    | 41  | 1.7                                             | 506                                | 2.5              | Combivir, Efavirenz, MTC, Folic Acid            |
| 119            | 5     | 0    | NC            | 127        | 1    | 32  | 5.0                                             | 621                                | 1                | Ritonavir, Saquinavir, Truvada, MTV, Folic Acid |
| 128            | 5     | 0    | NC            | 128        | 1    | 31  | 3.7                                             | 579                                | 1.5              | Combivir, Nelfinavir                            |
| 19             | 15    | 0    | NC            | 129        | 1    | 47  | 2.7                                             | 356                                | 2.5              | Reyataz, Epzicom, MTV                           |
| 180            | 1     | 0.5  | A             | 126        | 2    | 42  | 1.7                                             | 563                                | 2                | Didanosine                                      |
| 181            | 1     | 0.5  | A             | 127        | 2    | 53  | 1.7                                             | 520                                | 7                | Combivir, Nelfinavir                            |
| 56             | 11    | 0.5  | A             | 128        | 2    | 48  | 2.7                                             | 372                                | 0                | No                                              |
| 106            | 5     | 0.5  | A             | 129        | 2    | 37  | 3.7                                             | 456                                | 0                | No                                              |
| 168            | 1     | 0.5  | A             | 130        | 2    | 44  | 1.7                                             | 36                                 | 0                | No                                              |
| 179            | 1     | 1    | CI            | 126        | 3    | 52  | 1.7                                             | 916                                | 2                | Kaletra, Septra, Truvada, MTV, Folic Acid       |
| 172            | 2     | 1    | CI            | 127        | 3    | 48  | 1.7                                             | 262                                | 6                | Enfuvirtide, Raltegravir, Etravirine            |
| 166            | 5     | 1    | CI            | 128        | 3    | 63  | N/A                                             | N/A                                | 10               | Nelfinavir, Trizivir                            |
| 40             | 13    | 1    | CI            | 129        | 3    | 42  | 1.7                                             | 428                                | 0                | No                                              |

The Table 1 list includes 4 patients with normal cognition (MSK = 0); five patients that were asymptomatic (MSK = 0.5) and five cognitive impaired patients (MSK = 1). N/A: clinical information not available.

\*TMT Label 131 is the reference-pooled material made by adding same protein amount from all specimens of pools 1, 2, and 3 (HIV+ NC, HIV+ A, and HIV + CI).

<sup>a</sup>Cerebrospinal (CSF) penetration index (CPE).

<https://doi.org/10.1371/journal.pone.0181779.t001>

(PK), fructose-bisphosphate aldolase (Aldolase), phosphoglycerate kinase 1 (PGK-1), and 6-phosphogluconate dehydrogenase (6PGD) [23–25]. These showed up-regulation with a  $p < 0.05$  and a practical significance threshold of +1.5 F.C. in CI vs. NC (Fig 1). Two structural proteins, L-Plastin, Actinin alpha, also showed up-regulation with a  $p < 0.05$  and a practical significance threshold of +1.5 F.C. in CI vs. NC (Fig 1). The heat shock proteins HSP71kDa and HSP90AA1 were up-regulated by almost +1.0-F.C. in CI vs. NC. Both proteins are involved in cell protection from stress and the unfolded protein response. The eukaryotic elongation factor-1 (EF-1), a protein involved in cell regulation, was up-regulated by 0.5 F.C. from CI to NC. Gelsolin-like CAPG, filamin-A, moesin (MSN) and tubulin-alpha, proteins involved in cell motility and structure, were up-regulated in CI vs. NC by 0.5 to 1.0 F.C.

### A vs. NC and CI

EF-1 was up-regulated in A vs. NC and down-regulated from CI to A by +0.5 F.C. Vimentin was up-regulated in A vs. NC, but it was down-regulated by 1.0 F.C. in CI vs. A. Cathepsin B was not different in A vs. NC, but it was up-regulated in CI vs A with a 0.5 F.C. as shown in Fig 1.

### Ingenuity pathway analyses

The pathway analyses performed with the Ingenuity software for the 17 differentially expressed proteins revealed that most of these proteins can be grouped in canonical pathways associated to glucose metabolism: glycolysis, gluconeogenesis and NADH repair (Fig 2A). The diseases and disorders most associated to the set of proteins analyzed were inflammatory response,

**Table 2. List of proteins identified by TMT labeling and differentially expressed among the HAcI groups.**

| Accession    | Peptides | Protein Name                                           | NC <sup>1</sup> | A <sup>2</sup> | CI <sup>3</sup> | p value   |          | Biological Process / Molecular Pathway |
|--------------|----------|--------------------------------------------------------|-----------------|----------------|-----------------|-----------|----------|----------------------------------------|
|              |          |                                                        |                 |                |                 | NC vs. CI | A vs. CI |                                        |
| B4DQJ8_HUMAN | 8        | 6-phosphogluconate dehydrogenase, decarboxylating      | 0.493           | 0.823          | 1.528           | 0.0035    |          | Oxidative stress                       |
| B7TY16_HUMAN | 2        | Actinin alpha 1 isoform 3                              | 0.586           | 0.784          | 1.713           | 0.0091    |          | Cell structure & movement              |
| B2R9S4_HUMAN | 5        | Capping protein (actin filament), gelsolin-like (CAPG) | 0.27            | 0.59           | 0.607           | 0.0063    |          | Cell structure & movement              |
| B4DL49_HUMAN | 2        | Cathepsin B                                            | 0.465           | 0.431          | 0.919           |           | 0.0315   | Neurotoxicity                          |
| Q6IPN6_HUMAN | 13       | Elongation factor 1-alpha                              | 0.3             | 0.751          | 0.522           | 0.0408    | 0.0294   | Protein synthesis                      |
| Q5HY54_HUMAN | 9        | Filamin-A                                              | 0.405           | 0.823          | 0.945           | 0.0013    |          | Cell structure & movement              |
| J3KPS3_HUMAN | 4        | Fructose-bisphosphate aldolase                         | 0.231           | 0.565          | 0.765           | 0.0375    |          | Glycolysis pathway                     |
| Q6FGL0_HUMAN | 4        | Galectin                                               | 0.351           | 0.798          | 0.846           | 0.0047    | 0.0108   | Cell regulation                        |
| Q2TSD0_HUMAN | 17       | Glyceraldehyde-3-phosphate dehydrogenase               | 0.363           | 0.559          | 0.848           | 0.0236    |          | Glycolysis pathway                     |
| B3KTV0_HUMAN | 7        | Heat shock cognate 71 kDa protein                      | 0.379           | 0.655          | 0.851           | 0.0083    |          | Cell protection                        |
| Q2VPJ6_HUMAN | 4        | HSP90AA1 protein                                       | 0.319           | 0.541          | 1.008           | 0.008     | 0.0178   | Cell protection                        |
| Q53F11_HUMAN | 12       | L-plastin variant or Plastin-2                         | 0.419           | 0.699          | 1.469           | 0.0272    |          | Cell structure & movement              |
| Q6PJT4_HUMAN | 6        | MSN protein (Fragment)                                 | 0.41            | 0.696          | 0.893           | 0.0093    |          | Cell structure & movement              |
| B7Z7A9_HUMAN | 10       | Phosphoglycerate kinase                                | 0.342           | 0.543          | 1.1             | 0.0466    |          | Glycolysis pathway                     |
| B4DNK4_HUMAN | 21       | Pyruvate kinase                                        | 0.359           | 0.64           | 0.853           | 0.0165    |          | Glycolysis pathway                     |
| B3KPS3_HUMAN | 8        | Tubulin alpha-ubiquitous chain                         | 0.365           | 0.53           | 0.899           | 0.0091    |          | Cell structure & movement              |
| B0YJC4_HUMAN | 7        | Vimentin                                               | 0.802           | 1.477          | 0.788           |           | 0.0253   | Cell structure & movement              |

The number of peptides and the mean relative intensities of identified Proteins in MDM from HIV positive women characterized for HAcI. 1) NC = normal-cognition; 2) A = Asymptomatic 3) CI = Cognitive Impaired.

<https://doi.org/10.1371/journal.pone.0181779.t002>

immune responses, and neurological diseases. The majority of the proteins have functions related to cellular assembly, organization, function, maintenance and movement. IPA generated a single molecular network grouping all of the proteins, with direct and indirect interactions, associated to cellular assembly and organization, cellular function and maintenance and inflammatory response, for each of the two HAcI categories compared to NC: CI vs. NC, A vs. NC and CI vs. A (Fig 2A). Most of the proteins increased in A and CI patients, compared to NC, except for vimentin, EEF-1 and cathepsin B, for which the expression pattern along the groups is depicted in Fig 2B.

### Confirmation of differentially expressed proteins by western blot

Western blot was performed with a minimum of three samples from each group of patients (patients 019, 059, 119 and 128 with NC; patients 056, 106, 180 and 181 with A; and patients 001, 166, 172 and 179 with CI). Of the 4 proteins that showed significant differences in CI vs. NC with M2 proteomics, L-Plastin showed significant increased expression in CI vs. NC and in CI vs. A (p = 0.0316 and p = 0.0421, respectively), while 6-PGD exhibited a tendency to increase in A vs. NC, (p = 0.0593) (Fig 3).

To determine if L-Plastin was specific to HIV, five HIV seronegative donors were included in the western blots analyses. Results show a significant increase in L-Plastin in A and CI over HIV seronegative controls (p<0.0001), and HIV seropositive with normal cognition (p<0.0001) (S1 Fig). We did not observe significant differences between HIV seronegatives



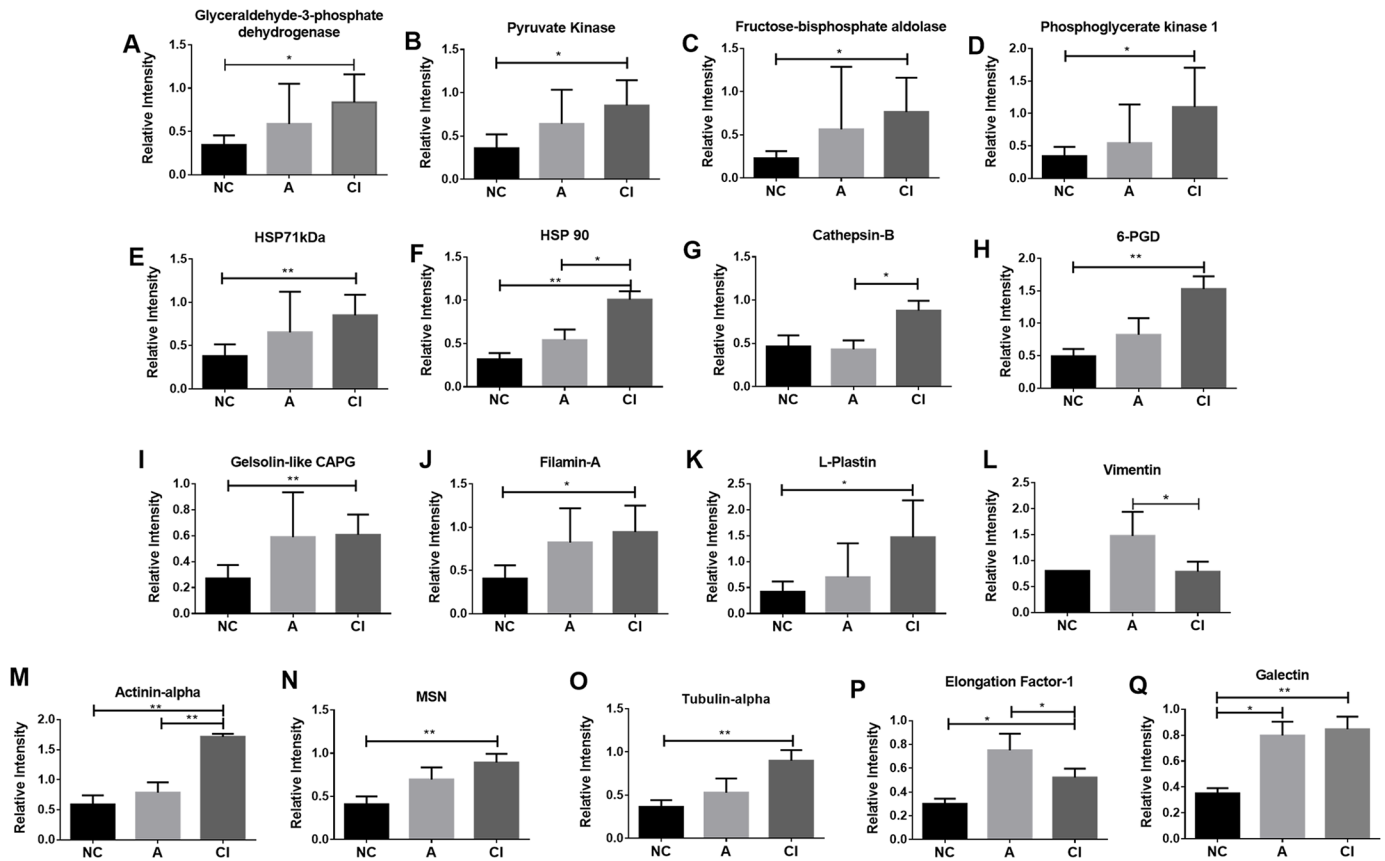

**Fig 1. Differentially expressed proteins by TMT and mass spectrometry.** A-D are proteins involved in the glycolysis pathway. E and F are the proteins involved with cell protection. G is the protein involved with neurotoxicity. H, and P are the proteins involved in oxidative stress and protein synthesis. From I to O are the proteins involved with the cell structure and motility. \* $p < 0.05$ ; \*\* $p < 0.01$ .

<https://doi.org/10.1371/journal.pone.0181779.g001>

and HIV seropositives with normal cognition ( $p = 0.089$ ), supporting a strong association of L-Plastin with cognitive impairment (S1 Fig).

## Discussion

Complementary therapies to prevent the development HAcI need to be discovered. As the HIV-infected MDM are the cells that migrate from the blood to the brain inducing inflammation and neurotoxicity, our study was designed to compare the proteins in MDM isolated from patients with HAcI to those with normal cognition using quantitative proteomics. Using 14 HIV seropositive patients, proteomics analyses identified a total of 17 proteins differentially expressed, with a significant increase of 7 proteins in patients with HAcI: 5 enzymes from the glucose metabolic pathways, and 2 proteins involved in cell structure and motility. However, validation of these proteins by western blots with commercially available antibodies detected significant changes in only two of the 7 proteins detected by proteomics: L-Plastin and 6-PGD. This is not surprising as antibodies detect specific epitopes that may not be the same as those peptides identified by mass spectrometry. Ideal validation is costly as will require custom-made antibodies against the peptides identified by proteomics. It is very important to emphasize that although TMT proteomics is a powerful method to identify and quantify proteins in health and disease, a small proportion of the proteins identified can be validated by western blots as shown in other studies [26,27].

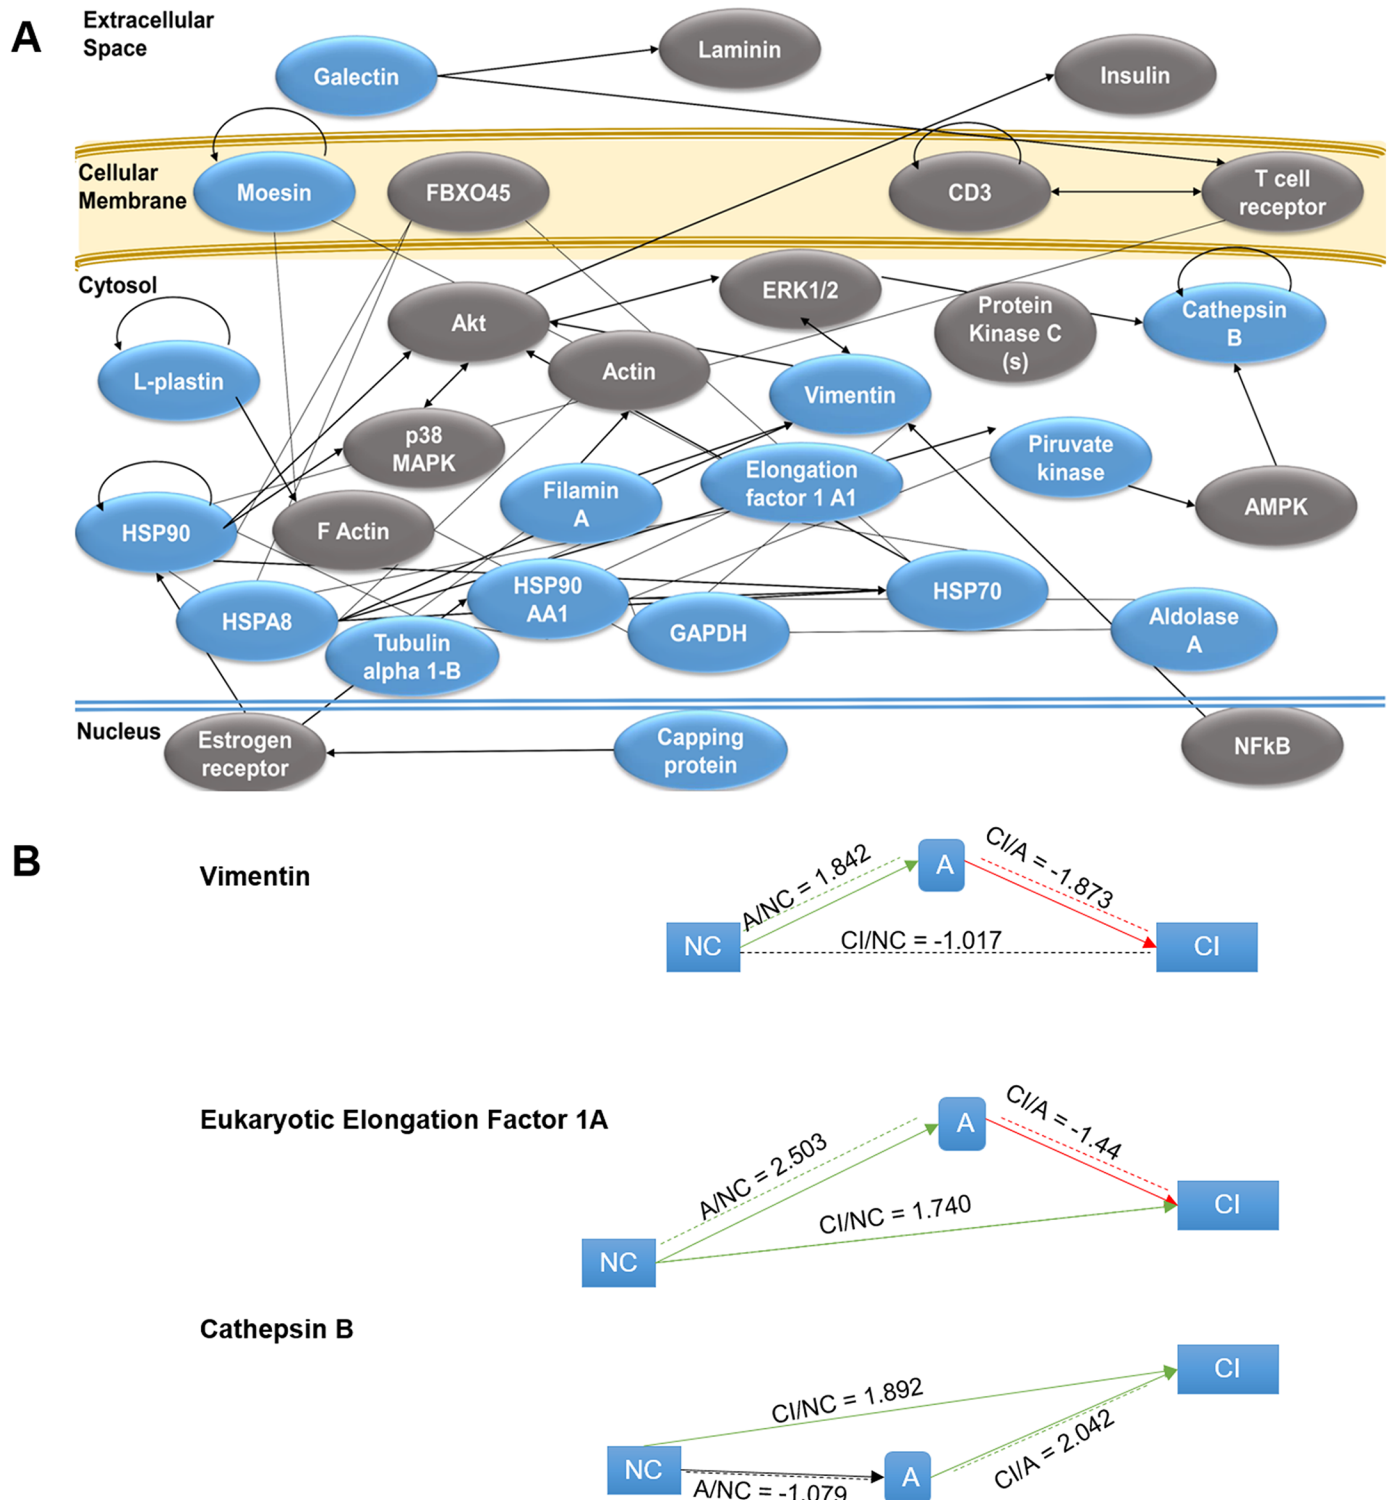

**Fig 2. Predicted network of interactions between the proteins identified in macrophages from HAcI patients.** (A) Blue proteins are from our dataset and the grey colored proteins are the ones that connect the proteins in our dataset according to IPA software. (B) The lower panel shows the pattern of increase/decrease followed by vimentin, EEF1 and cathepsin B among the groups of HAcI patients.

<https://doi.org/10.1371/journal.pone.0181779.g002>

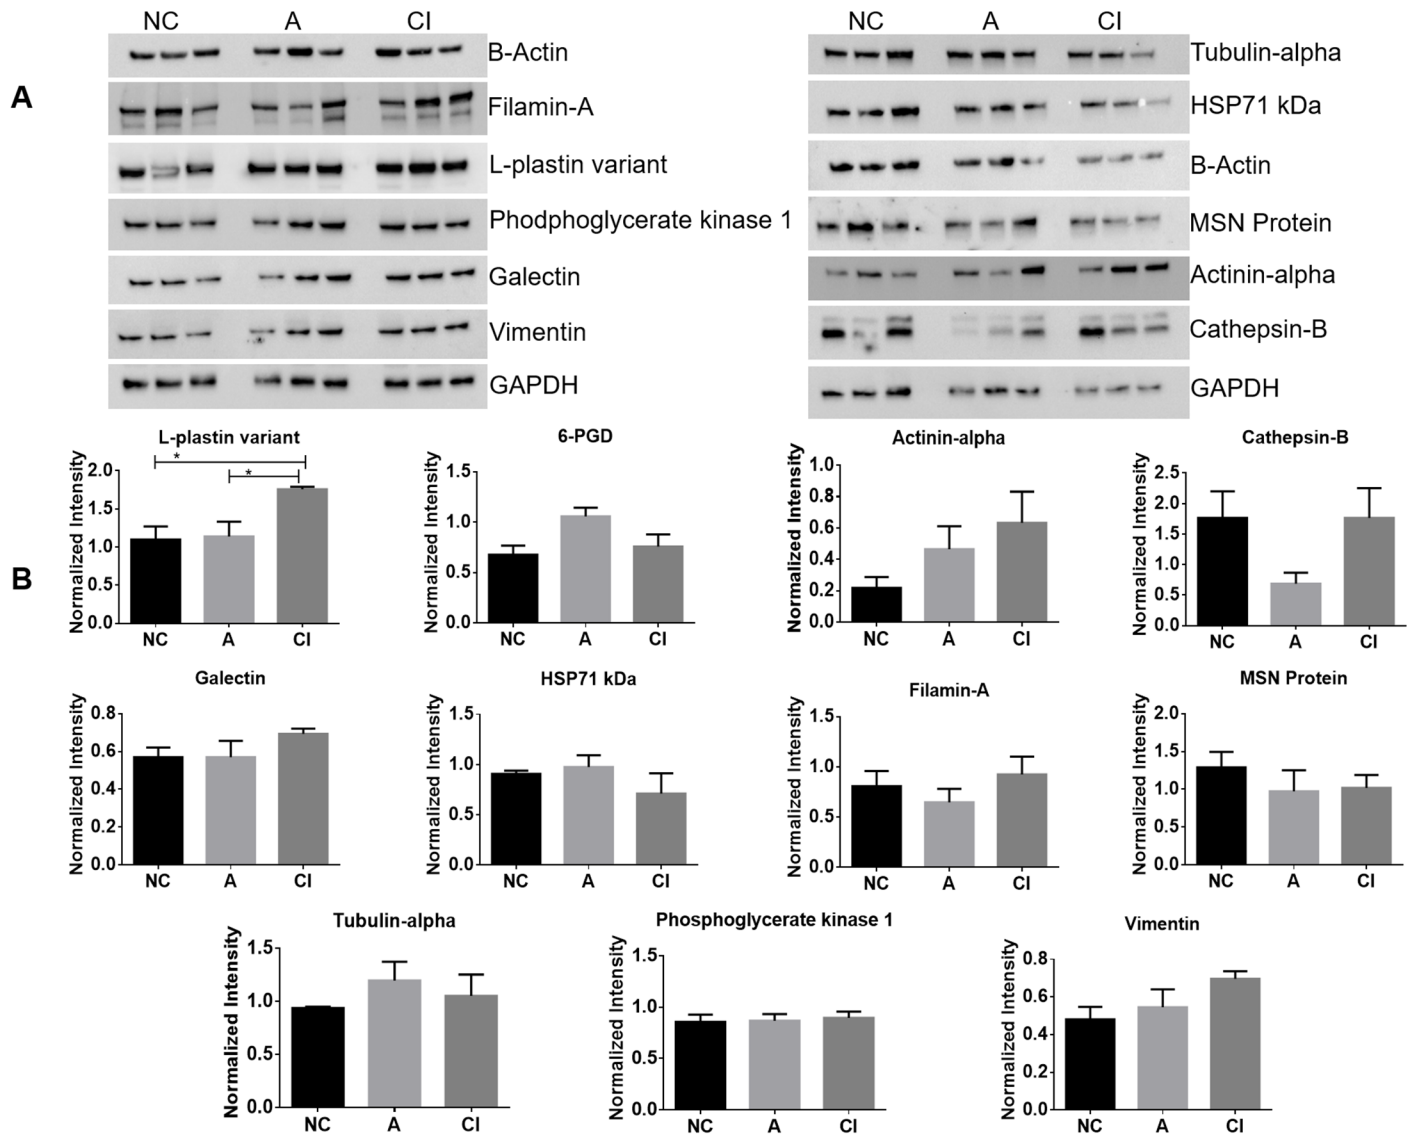

**Fig 3. Validation of proteins identified by western blot.** (A) Proteins identified by TMT labeling were tested by western blot from MDM lysates of the same patients whose samples were used for proteomics. (B) Densitometry analyses for the western blots were normalized against GAPDH. The statistic analysis between the three groups of patients was performed using One-way ANOVA with a significance of  $*p < 0.05$ . For Plastin-L, there were significant differences between NC vs CI ( $p = 0.0316$ ), and between ANI vs CI ( $p = 0.042$ ).

<https://doi.org/10.1371/journal.pone.0181779.g003>

L-Plastin found to be significantly increased with HAcI, is a protein involved in controlling the polarization and migration of chemokine-stimulated T-lymphocytes [28]. This protein has been previously identified and validated in the secretome of *in vitro* HIV infected macrophages [29]. These results suggest that HIV alters the expression and secretion of L-Plastin by macrophages to attract T-cells, increasing its efficiency of replication [29]. The 6-PGD enzyme that showed a tendency to increase in A over N group is important in the pentose phosphate pathway (PPP). It converts 6-phospho d-gluconolactone (glucose) to d-ribulose 5-phosphate resulting in the formation of nicotinamide adenine dinucleotide phosphate (NADPH) [30]. NADPH is the molecule required for redox reaction in the lipid production process and cellular oxidative stress, processes by which 6-PGD is associated with cancer and Alzheimer's

disease [31]. In Alzheimer's disease, glucose-6-phosphate dehydrogenase (G6PD) and 6-PGD both increase in the cortex [30], suggesting that altered glucose metabolism is associated to the development of neurodegenerative disorders. A previous proteomics study assessed the HIV-1 Viral protein (Vpr)-induced macrophage proteome differential expression *in vitro*, also identified glycolytic enzymes that increased with Vpr expression, specifically hexokinase (HK), G6PD, pyruvate kinase M2 (PKM2), and fumarate hydratase (fumarase) [32]. Upregulation of 6-PGD found in A patients suggests the activation of the PPP, which also promotes the synthesis of nucleotide pool for HIV-1 biosynthesis [32]. In another study using this Hispanic Latino women cohort, receptors related to glucose uptake, soluble insulin receptor (sIR) and soluble insulin-like growth factor-1 receptor (sIGF1-R), have been found to correlate with HAcI [33]. The sIR and sIGF1-R have crucial roles in glucose metabolism, and their levels in plasma could posit an association with asymptomatic glucose disorders in HIV-seropositive women, which may also lead to the development of HAcI [33]. Moreover, a longitudinal study analyzing CSF from HAcI patients revealed that alterations in energy metabolites in the CSF might be related to the worsening or improvement in neurocognitive impairment during HIV infection [34].

Excessive protein upregulation can be harmful if it ends in protein aggregation in the brain. It has been shown that some neurodegenerative disorders might be caused by abnormal intra- and/or extracellular deposition of misfolded, aggregated, or ubiquitinated proteins in the brain such as: heat shock proteins, cystatins, cathepsins, tau, and amyloid beta peptides, that result in neuronal dysfunction [35–53]. Amyloid peptides, tau, cathepsin B, and cystatins B and C have been identified in Hispanic Latino cohort of patients with HAcI [54–63]. However, western blots did not confirm significant differences for these proteins identified as significant by TMT labeling in the current study: actinin- $\alpha$ , cathepsin-B, galectin, HSP70, filamin A, MSN protein, aldolase, tubulin- $\alpha$ , PGK-1, and vimentin. One reason for the discrepancy between western blots and M2 proteomics is that the protein quantification via western blot relies on a single signal: the intensity of the expected band on the blot [64], which in turn depends on the specificity of the antibody used and the epitope targeted. Multiple antibodies against different epitopes in the same protein need to be tested because not all antibodies available were monoclonal that could identify the exact epitope detected by proteomics. Moreover, post-translational modifications (PTM) affect the binding of the antibody to its target, and this can be addressed using more than a single antibody to validate one protein by western blot. In contrast, specific peptides and PTMs are identified with LC/MS/MS and protein database searching by retention time, and the mass-to-charge ratio and intensities of precursor and product ions. From this particular experiment, we do not have information about the PTMs of the proteins identified. However, multiplexed, targeted proteomics experiments can be performed for large-scale, quantitative analysis of many peptides and PTMs in a single analysis projects [65], including M2 immunoproteomics methods that leverage antibody-based enrichment of low abundance species [4,14–18].

The major functions affected in HAcI are energy production and cellular homeostasis maintenance, probably because the cell needs to increase its processes rates to fight the viral infection, while the virus itself is hijacking the cell to facilitate its replication, viral particles assembly and cell-to-cell transmission. In macrophages, HIV buds in vesicles, therefore it affects the expression of structural proteins [66]. Since there is oxidative and cellular stress during viral infections, the heat shock proteins are also expected to be altered during the infection, in the cells' effort to protect themselves from apoptosis [67–71]. Altered cellular homeostasis, oxidative stress, and protein synthesis might explain why we have observed lysosomal disruption along with cathepsin B increased secretion from HIV-infected MDM *in vitro* [72–78].

We studied macrophages from 14 patients, 10 of them taking cART. Three of the four patients not taking cART were in the A category, and one in the CI category. This CI patient was virally suppressed and has been under cART regimen in previous cohort visits, with a constant CI diagnosis. We cannot make comparisons on the role of these proteins in cART because most of the patients were treated and the group is small. However, no differences were found between age, plasma viral load, CD4+ cell count or CPE among the three HAI categories. Moreover, 7/14 patients were virally suppressed and in particular 60% of the A and CI patients were suppressed. Therefore, the differences observed in the macrophage protein profile were not related to uneven distribution of clinical parameters between the groups, despite the expected clinical variability. In addition, 16 of the 17 proteins analyzed were significantly higher in CI patients compared to NC. Since both groups, 88% (8 of 9 total) patients were under cART, the increased of glycolysis related proteins found in these patients, appears to be related to cognitive impairment and not to antiviral treatment.

Four of the patients' samples analyzed were acquired during their first visit to the clinic: three A patients and one CI patient, limiting the possibility of discussing the relation of MDM protein profile to the progression of cognitive function, further limited by the small sample size. We recognize that our findings warrant further longitudinal and mechanistic studies, with a higher number of samples. Unfortunately, we do not have available MDM samples from additional Hispanic Cohort patients per group for proteomics studies. However, we recognize that our findings are relevant and warrant further studies. In addition, since our cohort is entirely comprised of women, this study should be expanded to consider men, since gender differences may result in macrophage proteome differences during HIV-1 infection.

We conclude that L-Plastin and 6-PGD, proteins with different functions in the cell, are associated with HAI. Since they were increased in A and CI patients when compared to NC and HIV seronegative controls, results suggest that the macrophages of patients with moderate to advanced neurocognitive impairment may be undergoing a rate of energy production and cytoskeleton rearrangement different from patients with normal cognition. These proteins are potential candidates for further molecular and longitudinal studies with increased number of patients to ascertain their role in HAI development and to uncover novel targets for therapy.

## Supporting information

**S1 Fig. Validation of L-Plastin in HIV seronegative controls.** (A) L-Plastin was tested by western blot from MDM lysates from HIV-seronegative controls ( $n = 4$ ) and patients with HAI. (B) Densitometry analyses for the western blots were normalized against GAPDH. The statistical analysis between the three groups of patients was performed using One-way ANOVA with a significance of  $*p < 0.05$ . For Plastin-L, there were significant differences between C and A ( $p < 0.0001$ ); C and CI ( $p < 0.0001$ ); and NC vs CI ( $p < 0.0001$ ). (DOCX)

**S1 Table. Raw data of proteins identified by microwave & Magnetic Proteomics of macrophages from HAI patients.** (XLSX)

**S2 Table. Proteomics analyses of macrophage secretome from HAI patients.** (XLSX)

**S3 Table. Statistics of relative intensities obtained by microwave & magnetic proteomics of macrophages from HAI patients.** (DOCX)



## Acknowledgments

This work was supported in part by NIH grants R01-MH08316-01, RCMI Translational Proteomics Center NIMHH (8G12-MD007600), SNRP-NINDS-1-U54NS43011, IDeA Networks of Biomedical Research Excellence (INBRE-PR) P20RR016470, MARC 5T34GM007821-34 and 5T34GM007821-35, RISE R25GM061838, PRCTRC-NCRR-P20RR11126, and SC1GM113691-03. We thank the contribution of Yolanda Rodriguez for macrophage isolation and culture. We thank the contributions of Dr. David Black (Protein Biomarker Core, University of Texas, San Antonio, Texas) for helping in the preparation of samples, and their analysis. We thank the Comprehensive Cancer Center U54 NIH-NCI CA 096297 for the proteomics laboratory facilities.

## Author Contributions

**Conceptualization:** Juliana Pérez-Laspiur, William E. Haskins, Loyda M. Meléndez.

**Data curation:** Yisel M. Cantres-Rosario, Juliana Pérez-Laspiur, William E. Haskins, Richard Skolasky, Israel Méndez-Bermúdez.

**Formal analysis:** Yisel M. Cantres-Rosario, Yadira M. Cantres-Rosario, Richard Skolasky.

**Funding acquisition:** Juliana Pérez-Laspiur, Loyda M. Meléndez.

**Investigation:** Frances M. Acevedo-Mariani, Juliana Pérez-Laspiur, William E. Haskins, Yadira M. Cantres-Rosario, Israel Méndez-Bermúdez, Loyda M. Meléndez.

**Methodology:** Frances M. Acevedo-Mariani, Juliana Pérez-Laspiur, William E. Haskins, Marines Plaud, Yadira M. Cantres-Rosario, Richard Skolasky, Israel Méndez-Bermúdez, Loyda M. Meléndez.

**Project administration:** Juliana Pérez-Laspiur, Loyda M. Meléndez.

**Software:** Yisel M. Cantres-Rosario, Richard Skolasky.

**Supervision:** William E. Haskins, Marines Plaud, Loyda M. Meléndez.

**Validation:** Marines Plaud, Yadira M. Cantres-Rosario.

**Visualization:** Yisel M. Cantres-Rosario, William E. Haskins.

**Writing – original draft:** Yisel M. Cantres-Rosario, Frances M. Acevedo-Mariani, Yadira M. Cantres-Rosario, Richard Skolasky, Israel Méndez-Bermúdez, Valerie Wojna, Loyda M. Meléndez.

**Writing – review & editing:** Yisel M. Cantres-Rosario, William E. Haskins, Richard Skolasky, Valerie Wojna, Loyda M. Meléndez.

## References

1. Sharp PM, Hahn BH. Origins of HIV and the AIDS pandemic. *Cold Spring Harb Perspect Med.* 2011; 1: 1–22. <https://doi.org/10.1101/cshperspect.a006841> PMID: 22229120
2. Ramesh G, Maclean AG, Philipp MT. Cytokines and Chemokines at the Crossroads of Neuroinflammation, Neurodegeneration, and Neuropathic Pain. *Mediators Inflamm.* Hindawi Publishing Corporation; 2013;480739. <https://doi.org/10.1155/2013/480739> PMID: 23997430
3. Koppensteiner H, Brack-Werner R, Schindler M. Macrophages and their relevance in Human Immunodeficiency Virus Type I infection. *Retrovirology.* 2012; 9: 82. <https://doi.org/10.1186/1742-4690-9-82> PMID: 23035819
4. Zhang L, Zhang X, Ma Q, Zhou H. Host proteome research in HIV infection. *Genomics Proteomics Bioinformatics.* 2010; [https://doi.org/10.1016/S1672-0229\(10\)60001-0](https://doi.org/10.1016/S1672-0229(10)60001-0) PMID: 20451157



5. Heaton RK, Franklin DR, Deutsch R, Letendre S, Ellis RJ, Casaletto K, et al. Neurocognitive Change in the Era of HIV Combination Antiretroviral Therapy: The Longitudinal CHARTER Study. *Clin Infect Dis*. 2015; 60: 473–480. <https://doi.org/10.1093/cid/ciu862> PMID: 25362201
6. Rodriguez-Franco EJ, Cantres-Rosario YM, Plaud-Valentin M, Romeu R, Rodríguez Y, Skolasky R, et al. Dysregulation of macrophage-secreted cathepsin B contributes to HIV-1-linked neuronal apoptosis. *PLoS One*. 2012; <https://doi.org/10.1371/journal.pone.0036571> PMID: 22693552
7. Cantres-Rosario Y, Plaud-Valentin M, Gerena Y, Skolasky RL, Wojna V, Meléndez LM. Cathepsin B and cystatin B in HIV-seropositive women are associated with infection and HIV-1-associated neurocognitive disorders. <https://doi.org/10.1097/QAD.0b013e32835b3e47> PMID: 23291538
8. Zenón F, Segarra AC, Gonzalez M, Meléndez LM. Cocaine potentiates cathepsin B secretion and neuronal apoptosis from HIV-infected macrophages. *J Neuroimmune Pharmacol*. 2014; 9: 703–15. <https://doi.org/10.1007/s11481-014-9563-z> PMID: 25209871
9. Rivera-Rivera L, Perez—Laspiur J, Colón K, Meléndez LM. Inhibition of interferon response by cystatin B: implication in HIV replication of macrophage reservoirs. *J Neurovirol*. <https://doi.org/10.1007/s13365-011-0061-2> PMID: 22147503
10. Cantres-Rosario YM, Hernandez N, Negron K, Perez-Laspiur J, Leszyk J, Shaffer SA, et al. Interacting partners of macrophage-secreted cathepsin B contribute to HIV-induced neuronal apoptosis. 2015; <https://doi.org/10.1097/QAD.0000000000000823> PMID: 26208400
11. Wiederin J, Rozek W, Duan F, Ciborowski P. Biomarkers of HIV-1 associated dementia: proteomic investigation of sera. *Proteome Sci*. 2009; 7: 8. <https://doi.org/10.1186/1477-5956-7-8> PMID: 19292902
12. Barrero CA, Datta PK, Sen S, Deshmane S, Amini S, Khalili K, et al. HIV-1 Vpr Modulates Macrophage Metabolic Pathways: A SILAC-Based Quantitative Analysis. *PLoS One*. 2013; <https://doi.org/10.1371/journal.pone.0068376> PMID: 23874603
13. Kraft-Terry S, Gerena Y, Wojna V, Plaud-Valentin M, Rodriguez Y, Ciborowski P, et al. Proteomic analyses of monocytes obtained from Hispanic women with HIV-associated dementia show depressed anti-oxidants. 2011; 4: 706–714. <https://doi.org/10.1002/prca.201000010>
14. Colon K, Perez-Laspiur J, Quiles R, Rodriguez Y, Wojna V, Shaffer SA, et al. Macrophage secretome from women with HIV-associated neurocognitive disorders. *Proteomics Clin Appl*. 2015; <https://doi.org/10.1002/prca.201400203> PMID: 26220577
15. Evans TM, Van Remmen H, Purkar A, Mahesula S, Gelfond JAL, Sabia M, et al. Microwave and magnetic (M2) proteomics of a mouse model of mild traumatic brain injury. *Transl Proteomics*. The Authors; 2014; 3: 10–21. <https://doi.org/10.1016/j.trprot.2014.03.002> PMID: 26157646
16. Raphael I, Mahesula S, Kalsaria K, Kotagiri V, Purkar AB, Anjanappa M, et al. Microwave and magnetic (M2) proteomics of the experimental autoimmune encephalomyelitis animal model of multiple sclerosis. *Electrophoresis*. 2012; <https://doi.org/10.1002/elps.201200200> PMID: 23161666
17. Raphael I, Mahesula S, Purkar A, Black D, Catala A, Gelfond JAL, et al. Microwave & magnetic (M2) proteomics reveals CNS-specific protein expression waves that precede clinical symptoms of experimental autoimmune encephalomyelitis. *Sci Rep*. 2014; 4: 6210. <https://doi.org/10.1038/srep06210> PMID: 25182730
18. Mahesula S, Raphael I, Raghunathan R, Kalsaria K, Kotagiri V, Purkar AB, et al. Immunoenrichment microwave and magnetic proteomics for quantifying CD47 in the experimental autoimmune encephalomyelitis model of multiple sclerosis. *Electrophoresis*. 2012; 33: 3820–3829. <https://doi.org/10.1002/elps.201200515> PMID: 23160929
19. Marder K, Albert SM, McDermott MP, McArthur JC, Schifitto G, Selnes OA, et al. Inter-rater reliability of a clinical staging of HIV-associated cognitive impairment. *Neurology*. 2003; 60: 1467–73. PMID: 12743233
20. Wojna V, Skolasky RL, Hechavarría R, Mayo R, Selnes O, McArthur JC, et al. Prevalence of human immunodeficiency virus-associated cognitive impairment in a group of Hispanic women at risk for neurological impairment. *J Neurovirol*. 2006; 12: 356–64. <https://doi.org/10.1080/13550280600964576> PMID: 17065128
21. Keller A, Nesvizhskii AI, Kolker E, Aebersold R. Empirical Statistical Model To Estimate the Accuracy of Peptide Identifications Made by MS/MS and Database Search. *Anal Chem*. 2002; 74: 5383–5392. <https://doi.org/10.1021/ac025747h> PMID: 12403597
22. Nesvizhskii AI, Keller A, Kolker E, Aebersold R. A statistical model for identifying proteins by tandem mass spectrometry. *Anal Chem*. 2003; 75: 4646–4658. <https://doi.org/10.1021/ac0341261> PMID: 14632076
23. Jalloh I, Carpenter KLH, Grice P, Howe DJ, Mason A, Gallagher CN, et al. Glycolysis and the pentose phosphate pathway after human traumatic brain injury: microdialysis studies using 1,2-(13)C2 glucose. *J Cereb Blood Flow Metab Off J Int Soc Cereb Blood Flow Metab*. Nature Publishing Group; 2015; 35: 111–120. <https://doi.org/10.1038/jcbfm.2014.177> PMID: 25335801

24. Manuscript A, Proximity I. NIH Public Access. 2011;4: 158–162.
25. Sundman MH, Hall EE, Chen N-K. Examining the Relationship between Head Trauma and Neurodegenerative Disease: A Review of Epidemiology, Pathology and Neuroimaging Techniques. *J Alzheimer's Dis Park.* 2014; 4: 1–21. <https://doi.org/10.4172/2161-0460.1000137> PMID: 25324979
26. Ratovitski T, Chaerkady R, Kammers K, Stewart JC, Zavala A, Pletnikova O, et al. Quantitative Proteomic Analysis Reveals Similarities between Huntington's Disease (HD) and Huntington's Disease-Like 2 (HDL2) Human Brains. *J Proteome Res.* 2016; 15: 3266–3283. <https://doi.org/10.1021/acs.jproteome.6b00448> PMID: 27486686
27. Gao W, Xu J, Wang F, Zhang L, Peng R, Shu Y, et al. Plasma membrane proteomic analysis of human Gastric Cancer tissues: revealing flotillin 1 as a marker for Gastric Cancer. *BMC Cancer.* BMC Cancer; 2015; 15: 367. <https://doi.org/10.1186/s12885-015-1343-5> PMID: 25948494
28. Dubey M, Singh AK, Awasthi D, Nagarkoti S, Kumar S, Ali W, et al. L-Plastin S-glutathionylation promotes reduced binding to  $\beta$ -actin and affects neutrophil functions. 2015; <https://doi.org/10.1016/j.freeradbiomed.2015.04.008> PMID: 25881549
29. Ciborowski P, Kadiu I, Rozek W, Smith L, Bernhardt K, Fladseth M, et al. Investigating the human immunodeficiency virus type 1-infected monocyte-derived macrophage secretome. 2007; <https://doi.org/10.1016/j.virol.2007.01.013> PMID: 17320137
30. Ramamoorthy H, Abraham P, Isaac B. Mitochondrial Dysfunction and Electron Transport Chain Complex Defect in a Rat Model of Tenofovir Disoproxil Fumarate Nephrotoxicity. *J Journal Biochem Mol Toxicol.* 2014; 28: 246–255.
31. Zekry D, Epperson TK, Krause K-H. A role for NOX NADPH oxidases in Alzheimer's disease and other types of dementia? *IUBMB Life.* 2003; 55: 307–13. <https://doi.org/10.1080/1521654031000153049> PMID: 12938732
32. Barrero CA, Datta PK, Sen S, Deshmane S, Amini S, Khalili K, et al. HIV-1 Vpr Modulates Macrophage Metabolic Pathways: A SILAC-Based Quantitative Analysis. *PLoS One.* 2013; 8. <https://doi.org/10.1371/journal.pone.0068376> PMID: 23874603
33. Gerena Y, Menéndez-Delmestre R, Skolasky RL, Hechavarria RM, Pérez S, Hilera C, et al. Soluble insulin receptor as a source of insulin resistance and cognitive impairment in HIV-seropositive women. *J Neurovirol.* 2015; 21: 113–119. <https://doi.org/10.1007/s13365-014-0310-2> PMID: 25604495
34. Dickens AM, Anthony DC, Deutsch R, Mielke MM, Claridge TDW, Grant I, et al. Cerebrospinal fluid metabolomics implicate bioenergetic adaptation as a neural mechanism regulating shifts in cognitive states of HIV-infected patients. *AIDS.* 2015; 29: 559–69. <https://doi.org/10.1097/QAD.0000000000000580> PMID: 25611149
35. Paul S, Mahanta S. Association of heat-shock proteins in various neurodegenerative disorders: Is it a master key to open the therapeutic door? *Mol Cell Biochem.* 2014; <https://doi.org/10.1007/s11010-013-1844-y> PMID: 24096700
36. Higgins GA, Lewis DA, Bahmanyar S, Goldgaber DC, Gajdusek C, Young WG, et al. Differential regulation of amyloid- $\beta$ -protein mRNA expression within hippocampal neuronal subpopulation in Alzheimer's disease. *Proc Natl Acad Sci.* 1988; 85: 1297–1301. PMID: 3277189
37. Londono D, Kuhs WF, Finney JL. Enclathration of helium in ice II: the first helium hydrate. *Nature.* 1988; 332: 141–142. <https://doi.org/10.1038/332141a0>
38. Barrow CJ, Zagorski MG. Solution structures of beta peptide and its constituent fragments: relation to amyloid deposition. *Science.* 1991; 253: 179–82. PMID: 1853202
39. Benes FM, Farol PA, Majocha RE, Marotta CA, Bird ED. Evidence for axonal loss in regions occupied by senile plaques in Alzheimer cortex. *Neuroscience.* 1991; 42: 651–660. [https://doi.org/10.1016/0306-4522\(91\)90034-L](https://doi.org/10.1016/0306-4522(91)90034-L) PMID: 1956514
40. Perry G, Friedman R, Shawt G. neurofibrillary tangles and senile plaque neurites of Alzheimer disease brains. 1987; 84: 3033–3036.
41. Ksiazak-Reding H, Dickson DW, Davies P, Yen SH. Recognition of tau epitopes by anti-neurofilament antibodies that bind to Alzheimer neurofibrillary tangles. *Proc Natl Acad Sci U S A.* 1987; 84: 3410–3414. <https://doi.org/10.1097/00002093-198701040-00024> PMID: 2437579
42. Irani DN, Anderson C, Gundry R, Cotter R, Moore S, Kerr DA, et al. Cleavage of cystatin C in the cerebrospinal fluid of patients with multiple sclerosis. *Ann Neurol.* 2006; 59: 237–47. <https://doi.org/10.1002/ana.20786> PMID: 16437581
43. Mares J, Kanovsky P, Herzig R, Stejskal D, Vavrouskova J, Hlustik P, et al. The assessment of beta amyloid, tau protein and cystatin C in the cerebrospinal fluid: laboratory markers of neurodegenerative diseases. *Neurol Sci.* 2009; 30: 1–7. <https://doi.org/10.1007/s10072-008-0005-7> PMID: 19153649
44. Gauthier S, Kaur G, Mi W, Tizon B, Levy E. Protective mechanisms by cystatin C in neurodegenerative diseases. *Front Biosci (Schol Ed).* 2011; 3: 541–54.

45. Zhong X-M, Hou L, Luo X-N, Shi H-S, Hu G-Y, He H-B, et al. Alterations of CSF cystatin C levels and their correlations with CSF A $\beta$ 40 and A $\beta$ 42 levels in patients with Alzheimer's disease, dementia with lewy bodies and the atrophic form of general paresis. *PLoS One*. 2013; 8: e55328. <https://doi.org/10.1371/journal.pone.0055328> PMID: 23383156
46. Skerget K, Taler-Vercic A, Bavdek A, Hodnik V, Ceru S, Tusek-Znidaric M, et al. Interaction between oligomers of stefin B and amyloid-beta in vitro and in cells. *J Biol Chem*. 2010; 285: 3201–10. <https://doi.org/10.1074/jbc.M109.024620> PMID: 19955183
47. Wang C, Sun B, Zhou Y, Grubb A, Gan L. Cathepsin B degrades amyloid- $\beta$  in mice expressing wild-type human amyloid precursor protein. *J Biol Chem*. 2012; 287: 39834–41. <https://doi.org/10.1074/jbc.M112.371641> PMID: 23024364
48. Hook V, Kindy M, Hook G. Inhibitors of Cathepsin B Improve Memory and Reduce  $\beta$ -Amyloid in Transgenic Alzheimer Disease Mice Expressing the Wild-type, but Not the Swedish Mutant,  $\beta$ -Secretase Site of the Amyloid Precursor Inhibitors of Cathepsin B Improve Memory and Reduce  $\beta$ -Amyl. *J Biol Chem*. 2008; 283: 7745–7753. <https://doi.org/10.1074/jbc.M708362200> PMID: 18184658
49. Kindy MS, Yu J, Zhu H, El-Amouri SS, Hook V, Hook GR. Deletion of the cathepsin B gene improves memory deficits in a transgenic ALZHeimer's disease mouse model expressing A $\beta$ PP containing the wild-type  $\beta$ -secretase site sequence. *J Alzheimers Dis*. 2012; 29: 827–40. <https://doi.org/10.3233/JAD-2012-111604> PMID: 22337825
50. Hook G, Yu J, Sipes N, Pierschbacher M, Hook V, Kindy MS. The Cysteine Protease Cathepsin B is a Key Drug Target and Cysteine Protease Inhibitors are Potential Therapeutics for Traumatic Brain Injury. *J Neurotrauma*. 2013; 808: 843–876. <https://doi.org/10.1089/neu.2013.2944> PMID: 24083575
51. Hook V, Funkelstein L, Wegrzyn J, Bark S, Kindy M, Hook G. Cysteine Cathepsins in the secretory vesicle produce active peptides: Cathepsin L generates peptide neurotransmitters and cathepsin B produces beta-amyloid of Alzheimer's disease. *Biochim Biophys Acta*. Elsevier B.V.; 2012; 1824: 89–104. <https://doi.org/10.1016/j.bbapap.2011.08.015> PMID: 21925292
52. Hook G, Hook V, Kindy M. The cysteine protease inhibitor, E64d, reduces brain amyloid- $\beta$  and improves memory deficits in Alzheimer's disease animal models by inhibiting cathepsin B, but not BACE1,  $\beta$ -secretase activity. *J Alzheimers Dis*. 2011; 26: 387–408. <https://doi.org/10.3233/JAD-2011-110101> PMID: 21613740
53. Hook VYH, Kindy M, Reinheckel T, Peters C, Hook G. Genetic cathepsin B deficiency reduces beta-amyloid in transgenic mice expressing human wild-type amyloid precursor protein. *Biochem Biophys Res Commun*. 2009; 386: 284–8. <https://doi.org/10.1016/j.bbrc.2009.05.131> PMID: 19501042
54. András IE, Toborek M. Amyloid beta accumulation in HIV-1-infected brain: The role of the blood brain barrier. *IUBMB Life*. 2013; 65: 43–9. <https://doi.org/10.1002/iub.1106> PMID: 23225609
55. Chen X, Hui L, Jd G. Amyloid Beta Accumulation in HIV-1 Infected Brain: The Role of Altered Cholesterol Homeostasis. 2014; 1: 1–8.
56. Cantres-Rosario YM, Hernandez N, Negron K, Perez-Laspiur J, Leszyk J, Shaffer S a., et al. Interacting partners of macrophage-secreted cathepsin B contribute to HIV-induced neuronal apoptosis. *Aids*. 2015; 29: 1.
57. Ortega M, Ances BM. Role of HIV in amyloid metabolism. *J Neuroimmune Pharmacol*. 2014; 9: 483–91. <https://doi.org/10.1007/s11481-014-9546-0> PMID: 24816714
58. Soontornniyomkij V, Moore DJ, Gouaux B, Soontornniyomkij B, Tatro ET, Umlauf A, et al. Cerebral  $\beta$ -amyloid deposition predicts HIV-associated neurocognitive disorders in APOE  $\epsilon$ 4 carriers. *AIDS*. 2012; 26: 2327–35. <https://doi.org/10.1097/QAD.0b013e32835a117c> PMID: 23018443
59. Vehmas A, Lieu J, Pardo C a, McArthur JC, Gartner S. Amyloid precursor protein expression in circulating monocytes and brain macrophages from patients with HIV-associated cognitive impairment. *J Neuroimmunol*. 2004; 157: 99–110. <https://doi.org/10.1016/j.jneuroim.2004.08.035> PMID: 15579286
60. Brown LAM, Scarola J, Smith AJ, Sanberg PR, Tan J, Giunta B. The role of tau protein in HIV-associated neurocognitive disorders. *Mol Neurodegener*. 2014; 9: 40. <https://doi.org/10.1186/1750-1326-9-40> PMID: 25304757
61. Kadiu I, Wang T, Schlautman JD, Dubrovsky L, Ciborowski P, Bukrinsky M, et al. HIV-1 transforms the monocyte plasma membrane proteome. *Cell Immunol*. 2009; 258: 44–58. <https://doi.org/10.1016/j.cellimm.2009.03.012> PMID: 19358982
62. Cantres-Rosario Y, Plaud-Valentin M, Gerena Y, Skolasky RL, Wojna V, Melendez LM. Cathepsin B and cystatin B in HIV-seropositive women are associated with infection and HIV-1-associated neurocognitive disorders. *Aids*. 2013; 27: 347–356. <https://doi.org/10.1097/QAD.0b013e32835b3e47> PMID: 23291538
63. Rozek W, Ricardo-Dukelow M, Holloway S, Gendelman HE, Wojna V, Melendez LM, et al. Cerebrospinal fluid proteomic profiling of HIV-1-infected patients with cognitive impairment. *J Proteome Res*. 2007; 6: 4189–99. <https://doi.org/10.1021/pr070220c> PMID: 17929958

64. Aebersold R, Burlingame AL, Bradshaw RA. Western Blots versus Selected Reaction Monitoring Assays: Time to Turn the Tables? 2013;
65. Liebler DC, Zimmerman LJ. Targeted Quantitation of Proteins by Mass Spectrometry. <https://doi.org/10.1021/bi400110b> PMID: 23517332
66. Benaroch P, Billard E, Gaudin R, Schindler M, Jouve M. HIV-1 assembly in macrophages Review. *Retrovirology*. 2010; 7: 1–10.
67. Gill AJ, Kolson DL. Dimethyl fumarate modulation of immune and antioxidant responses: application to HIV therapy. *Crit Rev Immunol*. 2013; 33: 307–59. PMID: 23971529
68. Chaudhary P, Khan SZ, Rawat P, Augustine T, Raynes DA, Guerriero V, et al. HSP70 binding protein 1 (HspBP1) suppresses HIV-1 replication by inhibiting NF- $\kappa$ B mediated activation of viral gene expression. *Nucleic Acids Res*. 2015; <https://doi.org/10.1093/nar/gkv1151> PMID: 26538602
69. Bivik C, Rosdahl I, Ollinger K. Hsp70 protects against UVB induced apoptosis by preventing release of cathepsins and cytochrome c in human melanocytes. *Carcinogenesis*. 2007; 28: 537–44. <https://doi.org/10.1093/carcin/bgl152> PMID: 16950797
70. Lu R-C, Tan M-S, Wang H, Xie A-M, Yu J-T, Tan L, et al. Heat Shock Protein 70 in Alzheimer's Disease. <https://doi.org/10.1155/2014/435203> PMID: 25431764
71. Anderson I, Low JS, Weston S, Weinberger M, Zhyvoloup A, Labokha AA, et al. Heat shock protein 90 controls HIV-1 reactivation from latency. <https://doi.org/10.1073/pnas.1320178111> PMID: 24706778
72. Elbim C, Pillet S, Prevost MH, Preira A, Girard PM, Rogine N, et al. The role of phagocytes in HIV-related oxidative stress. *J Clin Virol*. 2001; 20: 99–109. [https://doi.org/10.1016/S1386-6532\(00\)00133-5](https://doi.org/10.1016/S1386-6532(00)00133-5) PMID: 11166656
73. Price TO, Ercal N, Nakaoko R, Banks W a. HIV-1 viral proteins gp120 and Tat induce oxidative stress in brain endothelial cells. *Brain Res*. 2005; 1045: 57–63. <https://doi.org/10.1016/j.brainres.2005.03.031> PMID: 15910762
74. Ivanov A V, Valuev-Elliston VT, Ivanova ON, Kochetkov SN, Starodubova ES, Bartosch B, et al. Oxidative Stress during HIV Infection: Mechanisms and Consequences. *Oxid Med Cell Longev*. 2016; 2016: 8910396. <https://doi.org/10.1155/2016/8910396> PMID: 27829986
75. Repetto M, Reides C, Gomez Carretero ML, Costa M, Griemberg G, Llesuy S. Oxidative stress in blood of HIV infected patients. *Clin Chim Acta*. 1996; 255: 107–17. [https://doi.org/10.1016/0009-8981\(96\)06394-2](https://doi.org/10.1016/0009-8981(96)06394-2) PMID: 8937754
76. Deshmane SL, Mukerjee R, Fan S, Del Valle L, Michiels C, Sweet T, et al. Activation of the Oxidative Stress Pathway by HIV-1 Vpr Leads to Induction of Hypoxia-inducible Factor 1 Expression. *J Biol Chem*. 2009; 284: 11364–11373. <https://doi.org/10.1074/jbc.M809266200> PMID: 19204000
77. Kallianpur KJ, Gerschenson M, Mitchell BI, LiButti DE, Umaki TM, Ndhlovu LC, et al. Oxidative mitochondrial DNA damage in peripheral blood mononuclear cells is associated with reduced volumes of hippocampus and subcortical gray matter in chronically HIV-infected patients. *Mitochondrion*. 2016; 28: 8–15. <https://doi.org/10.1016/j.mito.2016.02.006> PMID: 26923169
78. Valcour V, Shiramizu B. HIV-associated dementia, mitochondrial dysfunction, and oxidative stress. *Mitochondrion*. 2004; 4: 119–29. <https://doi.org/10.1016/j.mito.2004.05.009> PMID: 16120377
